# Supplementary material for: Dog Walking before and during the COVID-19 Pandemic Lockdown: Experiences of UK Dog Owners
Source: MDPI journal article supplement (doi:10.3390/ijerph18126315), 2021-06-10
Supplement: s1 [file s1]

## Supplementary material file

Table S1: Multivariable regression analysis of variables associated with duration of dog's walking before the first UK COVID-19 lockdown (March / April 2020). Model based on 510 observations.  $F(22) = 5.38$ ,  $P = 0.00$ , Cragg-Uhler Pseudo- $R^2 = 0.28$ , AIC=243.18.

| Variable                                       | Regression coefficient | Standard Error | t value | 2.5% CI | 97.5% CI | P       |
|------------------------------------------------|------------------------|----------------|---------|---------|----------|---------|
| <b>Intercept</b>                               | 2.31                   | 0.13           | 18.12   | 2.04    | 2.75     | < 2e-16 |
| Number of dogs: 1                              | 0                      |                |         |         |          |         |
| Number of dogs: 2                              | -0.03                  | 0.03           | -0.83   | -0.16   | 0.02     | 0.41    |
| Number of dogs: 3                              | -0.05                  | 0.04           | -1.10   | -0.15   | 0.09     | 0.27    |
| Dog size: small/ toy                           | 0                      |                |         |         |          |         |
| Dog size: medium                               | 0.04                   | 0.04           | 1.08    | -0.05   | 0.14     | 0.28    |
| Dog size: large/giant                          | 0.09                   | 0.04           | 2.45    | -0.05   | 0.16     | 0.01    |
| Age: Under 1                                   | 0                      |                |         |         |          |         |
| Age: 1-5                                       | 0.00                   | 0.06           | -0.02   | -0.20   | 0.14     | 0.99    |
| Age: 6-10                                      | 0.03                   | 0.06           | 0.51    | -0.15   | 0.21     | 0.61    |
| Age: 10+                                       | 0.01                   | 0.08           | 0.07    | -0.23   | 0.21     | 0.94    |
| Dog's sex: female                              | 0                      |                |         |         |          |         |
| Dog's sex: male                                | -0.02                  | 0.03           | -0.78   | -0.07   | 0.08     | 0.43    |
| Dog's energy: low                              | 0                      |                |         |         |          |         |
| Dog's energy: medium                           | 0.09                   | 0.06           | 1.70    | -0.07   | 0.24     | 0.09    |
| Dog's energy: high                             | 0.24                   | 0.06           | 4.02    | 0.03    | 0.35     | <0.001  |
| Relationship: weak                             | 0                      |                |         |         |          |         |
| Relationship: medium                           | 0.02                   | 0.09           | 0.17    | -0.24   | 0.25     | 0.86    |
| Relationship: strong                           | 0.01                   | 0.09           | 0.14    | -0.27   | 0.22     | 0.89    |
| Owner does not live alone                      | 0                      |                |         |         |          |         |
| Owner lives alone                              | 0.04                   | 0.04           | 1.11    | -0.05   | 0.16     | 0.27    |
| Owner's age: 18-30                             | 0                      |                |         |         |          |         |
| Owner's age: 30-50                             | 0.09                   | 0.04           | 2.47    | -0.04   | 0.17     | 0.01    |
| Owner's age: 50+                               | 0.10                   | 0.04           | 2.42    | 0.01    | 0.23     | 0.02    |
| Owner's gender: male                           | 0                      |                |         |         |          |         |
| Owner's gender: female                         | 0.07                   | 0.04           | 1.51    | -0.08   | 0.17     | 0.13    |
| Owner's education: university Degree           | 0                      |                |         |         |          |         |
| Owner's education: professional                | 0.00                   | 0.04           | 0.07    | -0.10   | 0.11     | 0.94    |
| Owner's education: A-level or equivalent       | -0.11                  | 0.04           | -2.52   | -0.23   | 0.01     | 0.01    |
| Owner's education: below A-level or equivalent | -0.01                  | 0.04           | -0.14   | -0.26   | -0.01    | 0.89    |

Table S2: Weekly duration of dog's and person's walking before and during the COVID-19 first national lockdown. Within group comparison (change in walking duration between before and during the lockdown) is summarised with sample size (n), Mann-Whitney paired test-statistic (V) and significance levels (P).

| Variable | Dog's walking        |                      | Within-group change-dogs | Person's walking     |                      | Within-group change-people |
|----------|----------------------|----------------------|--------------------------|----------------------|----------------------|----------------------------|
|          | Before the lockdown, | During the lockdown, |                          | Before the lockdown, | During the lockdown, |                            |
|          |                      |                      |                          |                      |                      |                            |

|                                              | median<br>(IQR) | median<br>(IQR) |                              | median<br>(IQR) | median<br>(IQR) |                             |
|----------------------------------------------|-----------------|-----------------|------------------------------|-----------------|-----------------|-----------------------------|
| Weekly duration                              | 420 (350)       | 420 (330)       | 539,<br>V= 136373,<br>P=0.41 | 350 (360)       | 360 (270)       | 526,<br>V=135915,<br>P=0.62 |
| Living arrangements:<br>Living alone         | 500 (500)       | 420 (330)       | 82, V=2849,<br>P= 0.09       | 440 (420)       | 420 (335)       | 82, V=3093,<br>P=0.38       |
| Living with others                           | 420 (350)       | 420 (300)       | 443,<br>V=97306,<br>P=0.87   | 300 (300)       | 315 (210)       | 435,<br>V=9426,<br>P=0.93   |
| Household composition : Single-dog household | 420 (397.5)     | 420 (330)       | 300,<br>V=44446,<br>P=0.79   | 300 (300)       | 325 (214.25)    | 295,<br>V=44278,<br>P=0.71  |
| 2 dogs                                       | 420 (320)       | 420 (310)       | 157,<br>V=11853,<br>P=0.62   | 400 (360)       | 365 (285)       | 159,<br>V=1227,<br>P=0.66   |
| 3+ dogs                                      | 420 (387.5)     | 420 (335)       | 73, V=2445,<br>P=0.39        | 420 (405)       | 420 (350)       | 72, V=2207,<br>P=0.12       |
| Dog size: Toy/ Small                         | 420 (290)       | 420 (285)       | 118,<br>V=7320,<br>P=0.49    | 300 (315)       | 345 (220)       | 121,<br>V=7545,<br>P=0.68   |
| Medium                                       | 420 (350)       | 420 (350)       | 220,<br>V=25335,<br>P=0.35   | 360 (367)       | 400 (210)       | 219,<br>V=23066,<br>P=0.49  |
| Large or Giant                               | 467.5 (400)     | 420 (330)       | 188,<br>V=16937, P= 0.49     | 350 (370)       | 355 (282.5)     | 182,<br>V=16938, P= 0.64    |
| Age: Less than 1 year                        | 420 (345)       | 480 (280)       | 27, V=393,<br>P= 0.63        | 350 (315)       | 345 (247.5)     | 26, V=325,<br>P=1.0         |
| 1-5 years                                    | 420 (400)       | 420 (330)       | 269,<br>V=35540,<br>P=0.72   | 315 (360)       | 360 (270)       | 276,<br>V=37405,<br>P=0.99  |
| 6-10 years                                   | 420 (330)       | 420 (322.5)     | 189,<br>V=16941,<br>P=0.43   | 360 (370)       | 360 (280)       | 184,<br>V=16319,<br>P=0.55  |
| 11+ years                                    | 400 (220)       | 420 (250)       | 43, V=842,<br>P=0.60         | 300 (225)       | 280 (220)       | 43, V=969,<br>P= 0.70       |
| Dogs energy levels: High                     | 540 (490)       | 420 (350)       | 198,<br>V=17897,<br>P=0.16   | 360 (390)       | 402.5 (225)     | 199,<br>V=19107,<br>P=0.55  |
| Medium                                       | 420 (320)       | 420 (320)       | 294,<br>V=42559,<br>P=0.80   | 340 (345)       | 360 (270)       | 288,<br>V=41173,<br>P=0.88  |
| Low                                          | 300 (292.5)     | 337.5 (232.5)   | 37, V=562,<br>P=0.34         | 225 (260)       | 205 (195)       | 38, V=648,<br>P=0.56        |
| Relationship : Weak                          | 420 (210)       | 420 (200)       | 14, V=109,<br>P=0.63         | 250 (65)        | 300 (107.5)     | 13, V=51,<br>P=0.16         |

|        |           |           |                            |             |           |                            |
|--------|-----------|-----------|----------------------------|-------------|-----------|----------------------------|
| Medium | 420 (350) | 420 (305) | 263,<br>V=33559,<br>P=0.61 | 300 (285) ) | 310 (210) | 262,<br>V=34740,<br>P=0.75 |
| Strong | 420 (400) | 420 (330) | 253,<br>V=31046,<br>P=0.56 | 420 (420)   | 420 (290) | 250,<br>V=32886,<br>P=0.27 |

Table S3: Multivariable logistic regression model results for dog's reduction of total weekly dog walking duration (compared to stayed the same or increased) during the first UK COVID-19 lockdown (March / April 2020) before the backward elimination was used to identify significant variables. The model was run on 486 observations,  $X^2 = 18.14$ ,  $P=0.32$ , Pseudo  $R^2$  (Cragg-Uhler) =0.053, AIC=588.23

| Variables (n)              | Categories           | Odds Ratio<br>(95%<br>Confidence<br>Interval) | Z value | P    | Reduced<br>walking<br>% (n) | Did not<br>reduce/<br>increased<br>walking<br>% (n) |
|----------------------------|----------------------|-----------------------------------------------|---------|------|-----------------------------|-----------------------------------------------------|
| Number of dogs<br>(530)    | 1                    | 1                                             | -       | -    | 16.8 (89)                   | 39.8<br>(211)                                       |
|                            | 2                    | 1.20 ( 0.75-<br>1.93)                         | 0.76    | 0.44 | 10.2 (54)                   | 19.4<br>(103)                                       |
|                            | 3 or more            | 1.62 (0.89-<br>2.97)                          | 1.81    | 0.12 | 5.3 (28)                    | 8.5 (45)                                            |
| Dog size (526)             | Small or toy         | 1                                             | -       | -    | 6.3 (33)                    | 16.2 (85)                                           |
|                            | Medium               | 1.13 (0.67-<br>1.93)                          | 0.35    | 0.81 | 14.6 (77)                   | 27.2<br>(143)                                       |
|                            | Large or giant       | 0.97 ( 0.56-<br>1.70)                         | -0.4    | 0.88 | 11.4 (60)                   | 24.3<br>(128)                                       |
| Dog's age (530)            | Under 1<br>years old | 1                                             | -       |      | 1.5 (8)                     | 3.8 (20)                                            |
|                            | 1-5 years old        | 0.89 (0.34-<br>2.31)                          | -0.49   | 0.81 | 17.2 (91)                   | 33.8<br>(179)                                       |
|                            | 6-10 years<br>old    | 0.93 (0.34-<br>2.52)                          | -0.48   | 0.88 | 11.7 (62)                   | 24.0<br>(127)                                       |
|                            | 10 +                 | 0.48 (0.13-<br>1.70)                          | -1.45   | 0.25 | 1.9 (10)                    | 6.2 (33)                                            |
| Dog's sex (530)            | Male                 | 1                                             | -       | -    | 17.7 (94)                   | 35.6<br>(189)                                       |
|                            | Female               | 0.97 (0.64-<br>1.46)                          | -0.68   | 0.87 | 14.5 (77)                   | 32.1<br>(170)                                       |
| Dog energy levels<br>(530) | Low                  | 1                                             | -       | -    | 2.3 (12)                    | 4.7 (25)                                            |

|                                       |                                               |                  |       |      |            |            |
|---------------------------------------|-----------------------------------------------|------------------|-------|------|------------|------------|
|                                       | Medium                                        | 0.75 (0.33-1.70) | -0.62 | 0.49 | 16.8 (89)  | 38.7 (205) |
|                                       | High                                          | 0.73 (0.31-1.75) | -0.94 | 0.48 | 13.2 (70)  | 24.3 (129) |
| Relationship with dog (530)           | Weak                                          | 1                | -     | -    | 0.8 (5)    | 1.9 (10)   |
|                                       | Medium                                        | 0.75 (0.33-1.70) | 0.18  | 0.72 | 16.4 (87)  | 33.2 (176) |
|                                       | Strong                                        | 1.46 (0.35-6.05) | 0.38  | 0.6  | 15.1 (80)  | 32.6 (173) |
| Owner's living arrangements (522)     | Owner does not live alone                     | 1                | -     | -    | 32.8 (171) | 58.0 (303) |
|                                       | Owner lives alone                             | 1.71 (1.0-3.0)   | 1.78  | 0.05 | 6.5 (34)   | 9.6 (50)   |
| Owner's age (528)                     | 18-30                                         | 1                | -     | -    | 6.8 (36)   | 12.5 (66)  |
|                                       | 30-50                                         | 1.29 (0.75-2.22) | 0.9   | 0.36 | 15.5 (82)  | 27.7 (146) |
|                                       | 50+                                           | 0.68 (0.37-1.23) | -1.28 | 0.20 | 10.0 (53)  | 27.3 (144) |
| Owner's gender (527)                  | Man                                           | 1                | -     | -    | 2.8 (15)   | 7.8 (41)   |
|                                       | Woman                                         | 1.31 (0.63-2.73) | 0.73  | 0.46 | 29.4 (155) | 59.8 (315) |
| Owner's education (527)               | University degree                             | 1                | -     | -    | 19.4 (102) | 36.2 (191) |
|                                       | Professional diploma                          | 1.23 (0.72-2.13) | 0.76  | 0.44 | 5.9 (31)   | 12.7 (67)  |
|                                       | A-level or equivalent                         | 0.79 (0.40-1.54) | -0.69 | 0.49 | 3.2 (17)   | 8.9 (47)   |
|                                       | Below A-level or equivalent                   | 1.20 (0.61-2.34) | 0.53  | 0.59 | 4.0 (21)   | 9.7 (51)   |
| Does the owner have a care plan (529) | No                                            | 1                | -     | -    | 19.1 (101) | 43.5 (230) |
|                                       | Yes                                           | 1.29 (0.84-1.99) | 1.18  | 0.23 | 13.2 (70)  | 24.3 (128) |
| Symptoms of COVID-19 (529)            | Owner or household members did not experience | 1                | -     | -    | 28.2 (149) | 60.1 (318) |

|                                                 |                                                             |                  |      |      |            |            |
|-------------------------------------------------|-------------------------------------------------------------|------------------|------|------|------------|------------|
|                                                 | COVID-19 symptoms                                           |                  |      |      |            |            |
|                                                 | Owner or household members did experience COVID-19 symptoms | 1.26 (0.67-2.38) | 0.84 | 0.40 | 4.2 (22)   | 7.6 (40)   |
| Owner/household vulnerability to COVID-19 (529) | Owner or household members not described as vulnerable      | 1                | -    | -    | 22.9 (121) | 53.3 (282) |
|                                                 | Owner or household member considered vulnerable             | 1.78 (1.11-2.86) | 1.62 | 0.10 | 9.5 (50)   | 14.4 (76)  |

Table S4: Multivariable regression analysis of variables associated with duration of person's dog walking before the first UK COVID-19 lockdown (March / April 2020). The model is based on 511 observations,  $F(22) = 7.63$ ,  $P = 0.00$ , Cragg-Uhler Pseudo- $R^2 = 0.21$ , AIC = 396.60

|                      | Comparison category       | Estimate | Standard Error | t value | p-value |
|----------------------|---------------------------|----------|----------------|---------|---------|
| (Intercept)          | 2.22                      | 0.16     | 14.22          | < 2e-16 |         |
| Number of dogs: 2    | Number of dogs: 1         | 0.02     | 0.04           | 0.42    | 0.67    |
| Number of dogs: 3    | Number of dogs:1          | 0.11     | 0.05           | 2.18    | 0.03    |
| Size: medium         | Size: small/toy           | 0.07     | 0.04           | 1.61    | 0.11    |
| Size:large/ giant    | Size: small/toy           | 0.06     | 0.04           | 1.52    | 0.13    |
| Age: 1-5             | Age: Under 1              | -0.06    | 0.07           | -0.78   | 0.43    |
| Age: 6-10            | Age: Under 2              | -0.03    | 0.08           | -0.38   | 0.71    |
| Age: 10+             | Age: Under 3              | -0.05    | 0.09           | -0.53   | 0.60    |
| Dog's sex: male      | Sex:male                  | -0.03    | 0.03           | -0.98   | 0.33    |
| Dog's energy: medium | Energy:low                | 0.12     | 0.07           | 1.78    | 0.08    |
| Dog's energy: high   | Energy:low                | 0.16     | 0.07           | 2.34    | 0.02    |
| Relationship: medium | Relationship: weak        | 0.02     | 0.11           | 0.14    | 0.89    |
| Relationship: strong | Relationship: weak        | 0.06     | 0.12           | 0.56    | 0.58    |
| Owner lives alone    | Owner does not live alone | 0.12     | 0.04           | 2.81    | 0.01    |
| Owner's age: 30-50   | Owner's age: 18-30        | 0.10     | 0.04           | 2.31    | 0.02    |

|                                                |                                      |       |      |       |      |
|------------------------------------------------|--------------------------------------|-------|------|-------|------|
| Owner's age: 50+                               | Owner's age: 18-30                   | 0.09  | 0.05 | 1.87  | 0.06 |
| Owner's gender: female                         | Owner's gender: male                 | 0.04  | 0.05 | 0.70  | 0.48 |
| Owner's education: Professional                | Owner's education: University Degree | -0.01 | 0.04 | -0.14 | 0.89 |
| Owner's education: A-levels or equivalent      | Owner's education: University Degree | -0.18 | 0.05 | -3.58 | 0.00 |
| Owner's education: below A-level or equivalent | Owner's education: University Degree | 0.01  | 0.05 | 0.29  | 0.77 |

Table S5. Multivariable logistic regression model results for person's reduction of total weekly dog walking duration (compared to stayed the same or increased) during the first UK COVID-19 lockdown (March / April 2020) before the backward elimination was used to identify significant variables. The model was run on 491 observations,  $X^2 = 25.92$ ,  $P=0.13$ , Pseudo  $R^2$  (Cragg-Uhler) =0.074, AIC=601.06.

| Variables (n)        | Categories        | Odds Ratio (95% Confidence Interval) | Z value | P    | Reduced walking % (n) | Did not reduce/ increased walking % (n) |
|----------------------|-------------------|--------------------------------------|---------|------|-----------------------|-----------------------------------------|
| Number of dogs (523) | 1.00              | 1.00                                 | -       | -    | 13.4 (7)              | 40.0 (209)                              |
|                      | 2.00              | 1.20 (0.75-1.93)                     | 0.48    | 0.45 | 7.7 (40)              | 20.5 (107)                              |
|                      | 3 or more         | 1.73 (0.96- 3.15)                    | 2.08    | 0.07 | 5.0 (26)              | 8.2 (43)                                |
| Dog size (519)       | Small or toy      | 1.00                                 | -       | -    | 5.8 (30)              | 15.8 (82)                               |
|                      | Medium            | 1.1 (0.65- 1.86)                     | 0.56    | 0.73 | 11.6 (60)             | 28.3 (147)                              |
|                      | Large or giant    | 0.89 (0.51- 1.56)                    | -0.01   | 0.69 | 8.9 (46)              | 24.3 (126)                              |
| Dog's age (523)      | Under 1 years old | 1.00                                 | -       | -    | 1.3 (7)               | 3.4 (18)                                |
|                      | 1-5 years old     | 0.79 (0.31- 2.03)                    | -0.05   | 0.62 | 13.4 (70)             | 35.2 (184)                              |
|                      | 6-10 years old    | 0.79 (0.29- 2.10)                    | 0.16    | 0.63 | 9.9 (52)              | 23.7 (124)                              |

|                                   |                             |                   |       |      |            |             |
|-----------------------------------|-----------------------------|-------------------|-------|------|------------|-------------|
|                                   | 10 +                        | 0.39 (0.11- 1.39) | -0.99 | 0.15 | 1.3 (7)    | 6.3 (33)    |
| Dog's sex (523)                   | Male                        | 1.00              | -     | -    | 14.3 (75)  | 36.1 (189)  |
|                                   | Female                      | 0.87 (0.57- 1.31) | -0.50 | 0.50 | 11.7 (61)  | 32.5 (170)  |
| Dog energy levels (523)           | Low                         | 1.00              | -     | -    | 2.1 (11)   | 4.8 (25)    |
|                                   | Medium                      | 0.77 (0.34-1.75)  | -0.35 | 0.54 | 14.7 (77)  | 38.2 (200)  |
|                                   | High                        | 0.66 (0.28 -1.57) | -0.52 | 0.35 | 9.2 (48)   | 25.6 (134)  |
| Relationship with dog (523)       | Weak                        | 1.00              | -     | -    | 0.6 (3)    | 1.9 (10)    |
|                                   | Medium                      | 1.13 (0.28- 4.5)  | 0.14  | 0.86 | 11.7 (61)  | 35.4 (185)  |
|                                   | Strong                      | 1.31 (0.33- 5.23) | 0.57  | 0.71 | 13.8 (72)  | 31.4 (164)  |
| Owner's living arrangements (515) | Owner does not live alone   | 1.00              | -     | -    | 20.4 (105) | 59.4 (306)  |
|                                   | Owner lives alone           | 1.63 (0.95-2.80)  | 2.10  | 0.08 | 5.6 (29)   | 9.5 (49)    |
| Owner's age (521)                 | 18-30                       | 1.00              | -     | -    | 5.0 (26)   | 13.8 (72)   |
|                                   | 30-50                       | 1.26 (0.72- 2.22) | 1.12  | 0.84 | 13.4 (70)  | 27.4 (143)  |
|                                   | 50+                         | 0.70 (0.37- 1.31) | -0.88 | 0.24 | 7.7 (40)   | 27.4 (143)  |
| Owner's gender (521)              | Man                         | 1.00              | -     | -    | 1.7 (9)    | 8.1 (42)    |
|                                   | Woman                       | 1.49 (0.68- 3.26) | 1.65  | 0.32 | 24.4 (127) | 60.6 (315)_ |
| Owner's education (522)           | University degree           | 1.00              | -     | -    | 15 (78)    | 38.3 (199)  |
|                                   | Professional diploma        | 1.13 (0.65- 1.98) | 0.60  | 0.66 | 5.4 (28)   | 11.7 (61)   |
|                                   | A-level or equivalent       | 0.69 (0.34- 1.40) | -1.15 | 0.31 | 2.5 (13)   | 9.4 (49)    |
|                                   | Below A-level or equivalent | 1.0 (0.52- 1.95)  | -0.39 | 0.99 | 3.3 (17)   | 9.4 (49)    |

|                                                 |                                                                 |                   |      |      |            |             |
|-------------------------------------------------|-----------------------------------------------------------------|-------------------|------|------|------------|-------------|
| Does the owner have a care plan (521)           | No                                                              | 1.00              | -    | -    | 14.4 (75)  | 44.44 (232) |
|                                                 | Yes                                                             | 1.33 (0.86-2.04)  | 1.93 | 0.20 | 11.7 (61)  | 24.3 (127)  |
| Symptoms of COVID-19 (523)                      | Owner or household members did not experience COVID-19 symptoms | 1.00              | -    |      | 22.6 (118) | 320 (61.2)  |
|                                                 | Owner or household members did experience COVID-19 symptoms     | 1.31 (0.70-2.46)  | 0.74 | 0.40 | 3.4 (18)   | 39 (7.5)    |
| Owner/household vulnerability to COVID-19 (522) | Owner or household members not described as vulnerable          | 1.00              | -    | -    | 18.8 (98)  | 54.0 (282)  |
|                                                 | Owner or household member considered vulnerable                 | 1.50 ( 0.92-2.41) | 1.52 | 0.10 | 7.3 (38)   | 14.8 (77)   |
